# Supplementary material for: The Frailty In Residential Sector over Time (FIRST) study: methods and baseline cohort description
Source: Springer Nature journal article supplement (doi:10.1186/s12877-020-01974-1), 2021-02-03
Supplement: MOESM2 [file 18830080]

Additional File 2: FIRST Study 60-Item Frailty Index

| <b>60-Item Frailty Index (FI)</b> |                                                  |                                                   |
|-----------------------------------|--------------------------------------------------|---------------------------------------------------|
| Myocardial infarction             | Any tumor                                        | Dozing while watching TV <sup>c</sup>             |
| Congestive heart failure          | Falls                                            | Dozing while sitting in public <sup>c</sup>       |
| Peripheral vascular disease       | Bathing <sup>a</sup>                             | Dozing as a passenger in a car <sup>c</sup>       |
| Cerebrovascular disease           | Dressing <sup>a</sup>                            | Dozing while lying down to rest <sup>c</sup>      |
| Dementia                          | Toileting <sup>a</sup>                           | Dozing while sitting after lunch <sup>c</sup>     |
| Chronic pulmonary disease         | Physical health <sup>b</sup>                     | Napping frequency <sup>f</sup>                    |
| Connective tissue disease         | Energy <sup>b</sup>                              | Facial expression <sup>g</sup>                    |
| Ulcer disease                     | Mood <sup>b</sup>                                | Body language <sup>g</sup>                        |
| Hypertension                      | Living situation <sup>b</sup>                    | Memory <sup>h</sup>                               |
| Atrial fibrillation               | Family <sup>b</sup>                              | Speech and language <sup>h</sup>                  |
| Insomnia                          | Friends <sup>b</sup>                             | Recognition of family members <sup>h</sup>        |
| Depression                        | Self as a whole <sup>b</sup>                     | Orientation to time <sup>h</sup>                  |
| Arthritis                         | Ability to do things for fun <sup>b</sup>        | Orientation to place <sup>h</sup>                 |
| Hip fracture                      | Life as a whole <sup>b</sup>                     | Ability to make decisions <sup>h</sup>            |
| Other fracture                    | Food intake decline <sup>c</sup>                 | Social and community activity <sup>h</sup>        |
| Osteoporosis                      | Weight loss <sup>c</sup>                         | Home activities and responsibilities <sup>h</sup> |
| Gout                              | Neuropsychological problems <sup>c</sup>         | Personal care, cleanliness <sup>h</sup>           |
| Pressure sores                    | Body mass index, calf circumference <sup>c</sup> | Eating <sup>h</sup>                               |
| Dry eyes                          | Sedation scale <sup>d</sup>                      | Control of urination and bowels <sup>h</sup>      |
| Urinary incontinence              | Dozing while reading <sup>e</sup>                | Ability to get from place to place <sup>h</sup>   |

FI Categories: non-frail (0 to ≤0.1), vulnerable (>0.1 to 0.21), frail (>0.21 to <0.45), most-frail (0.45 or more); <sup>a</sup>Katz Activities of Daily Living Scale, <sup>b</sup>13-Item Quality of Life in Alzheimer's Disease Scale, <sup>c</sup>Mini Nutritional Assessment Short Form, <sup>d</sup>Pasero Opioid Induced Sedation Scale, <sup>e</sup>Epworth Sleepiness Scale, <sup>f</sup>Sleep Quality Questionnaire, <sup>g</sup>Pain Assessment in Advanced Dementia Scale, <sup>h</sup>Dementia Severity Rating Scale
