# Supplementary material for: The Frailty In Residential Sector over Time (FIRST) study: methods and baseline cohort description
Source: Springer Nature journal article supplement (doi:10.1186/s12877-020-01974-1), 2021-02-03
Supplement: MOESM3 [file 18830080]

Additional File 3: FIRST Study FRAIL-NH

| Variable                  | 0                                                   | 1                                                                                           | 2                                                                                            |
|---------------------------|-----------------------------------------------------|---------------------------------------------------------------------------------------------|----------------------------------------------------------------------------------------------|
| Energy <sup>a</sup>       | Feeling down, depressed or hopeless: not at all (0) | Feeling down, depressed or hopeless: several days (1) <b>OR</b> more than half the days (2) | Feeling down, depressed or hopeless <b>AND</b> Little interest or pleasure (total $\geq 3$ ) |
| Transferring <sup>b</sup> | Difficulty transferring from chair/bed: none (0)    | Difficulty transferring from chair/bed: Some (1)                                            | Difficulty transferring from chair/bed: A lot/unable without help (2)                        |
| Mobility <sup>c</sup>     | Goes out (DSRS #12 Score 0-2)                       | Able to get out of bed/chair but not go out (DSRS #12 Score 3-4)                            | Bed or chair bound (DSRS #12 Score 5-6)                                                      |
| Continence <sup>c</sup>   | Normal <b>OR</b> rarely fails (DSRS #11 Score 0-1)  | Occasionally <b>OR</b> frequently fails (DSRS #11 Score 2-3)                                | Generally fails (DSRS #11 Score 4)                                                           |
| Weight Loss <sup>d</sup>  | No weight loss                                      | 1–3 kg <b>OR</b> does not know                                                              | >3 kg (6.6 pounds)                                                                           |
| Feeding <sup>c</sup>      | Normal (DSRS #10 Score 0)                           | May require help (DSRS #10 Score 1-2)                                                       | Needs to be fed (DSRS #10 Score 3)                                                           |
| Dressing <sup>c</sup>     | Independent (DSRS #9 Score 0)                       | May require help (DSRS #9 Score 1-2)                                                        | Totally dependent (DSRS #9 Score 3)                                                          |

Total score: 0-14, Categories: 0-2 non-frail, 3-6 frail, 7-14 most-frail

<sup>a</sup> Patient Health Questionnaire-4; <sup>b</sup> SARC-F; <sup>c</sup> Dementia Severity Rating Scale; <sup>d</sup> Mini Nutritional Assessment Short Form
